# Supplementary material
Source: publisher figshare collection journal article supplement (https://acs.figshare.com/ndownloader/files/4559635)
Supplement: Supplementary file 1 [file 4559635]

# Computational Study of Protein Splicing: entire reaction pathway for C-terminal Splice and Intein scission

Jon I. Mujika,<sup>1</sup> Xabier Lopez,<sup>2</sup> and Adrian Mulholland<sup>1</sup>

<sup>1</sup>Centre for Computational Chemistry, School of Chemistry, University of Bristol, Bristol BS8 1TS, UK

<sup>2</sup>Kimika Fakultatea, Euskal Herriko Unibertsitatea and Donostia International Physics Center (DIPC), P.K. 1072, 20080 Donostia, Euskadi (Spain))

Figure 1: Energy profile in kcal/mol for all reaction pathways characterized along the present work: the three pathways of Asn-Thr dipeptide and the Large model. In order to test the validity of B3LYP DFT functional, the energy of all stationary points were recalculated at the B3LYP/6-31+G(d) optimized geometries with two other DFT functionals (B3PW91 and B3P86) and MP2 ab-initio method. The 6-311++G(d,p) basis set was used for all calculations.

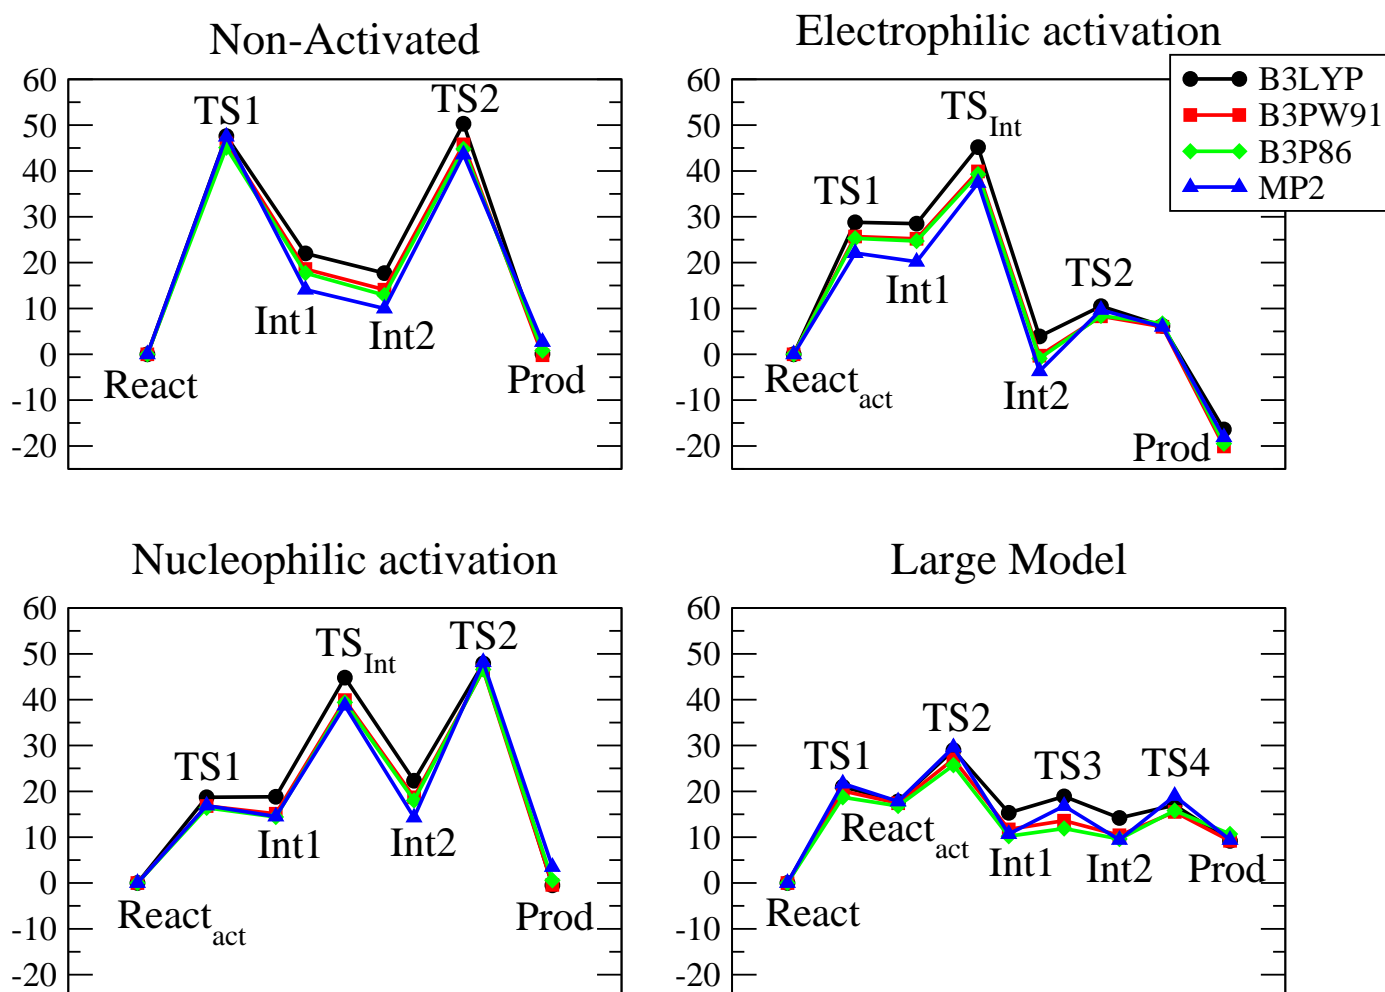

Table I: Electronic energy values in kcal/mol for all reaction pathways characterized along the present work: the three pathways of Asn-Thr dipeptide and the Large model. In order to test the validity of B3LYP DFT functional, the energy of all stationary points were recalculated at the B3LYP/6-31+G(d) optimized geometries with two other DFT functionals (B3PW91 and B3P86) and MP2 ab-initio method. The 6-311++G(d,p) basis set was used for all calculations.

|                                           | B3LYP | B3PW91 | B3P86 | MP2   |
|-------------------------------------------|-------|--------|-------|-------|
| <b>Non-activated Reaction</b>             |       |        |       |       |
| <b>React</b>                              | 0.0   | 0.0    | 0.0   | 0.0   |
| <b>TS1</b>                                | 47.6  | 46.0   | 45.1  | 47.5  |
| <b>Int1</b>                               | 22.0  | 18.6   | 17.7  | 14.1  |
| <b>Int2</b>                               | 17.7  | 14.1   | 12.9  | 10.0  |
| <b>TS2</b>                                | 50.3  | 45.8   | 44.8  | 43.6  |
| <b>Prod</b>                               | 0.1   | -0.2   | 0.8   | 2.7   |
| <b>Electrophilic activation</b>           |       |        |       |       |
| <i>React<sup>elec</sup><sub>act</sub></i> | 0.0   | 0.0    | 0.0   | 0.0   |
| <b>TS1</b>                                | 28.8  | 25.7   | 25.3  | 22.1  |
| <b>Int1</b>                               | 28.5  | 25.2   | 24.7  | 20.2  |
| <i>TS<sub>Int</sub></i>                   | 45.2  | 39.9   | 39.3  | 37.4  |
| <b>Int2</b>                               | 3.9   | -0.3   | -0.9  | -3.7  |
| <b>TS2</b>                                | 10.5  | 8.3    | 8.4   | 9.7   |
| <b>Prod1</b>                              | 6.2   | 6.0    | 6.7   | 6.0   |
| <b>Prod2</b>                              | -16.4 | -20.1  | -19.5 | -18.1 |
| <b>Nucleophilic activation</b>            |       |        |       |       |
| <i>React<sup>nuct</sup><sub>act</sub></i> | 0.0   | 0.0    | 0.0   | 0.0   |
| <b>TS1</b>                                | 18.7  | 16.8   | 16.4  | 16.9  |
| <b>Int1</b>                               | 18.8  | 15.1   | 14.4  | 14.5  |
| <i>TS<sub>Int</sub></i>                   | 44.8  | 39.9   | 39.4  | 38.7  |
| <b>Int2</b>                               | 22.3  | 18.7   | 18.0  | 14.3  |
| <b>TS2</b>                                | 47.9  | 46.5   | 46.6  | 48.2  |
| <b>Prod</b>                               | -0.5  | -0.4   | 0.6   | 3.5   |
| <b>Large model</b>                        |       |        |       |       |
| <b>React</b>                              | 0.0   | 0.0    | 0.0   | 0.0   |
| <b>TS1</b>                                | 21.0  | 20.1   | 18.7  | 21.7  |
| <i>React<sub>act</sub></i>                | 17.8  | 17.4   | 16.8  | 17.8  |
| <b>TS2</b>                                | 29.0  | 27.0   | 25.7  | 29.6  |
| <b>Int1</b>                               | 15.3  | 11.7   | 10.2  | 10.7  |
| <b>TS3</b>                                | 18.9  | 13.6   | 11.9  | 16.8  |
| <b>Int2</b>                               | 14.2  | 10.4   | 9.6   | 9.4   |
| <b>TS4</b>                                | 17.0  | 15.5   | 15.8  | 19.0  |
| <b>Prod</b>                               | 9.2   | 9.2    | 10.7  | 9.4   |
